# Supplementary material for: Characterisation of the Semliki Forest Virus-host cell interactome reveals the viral capsid protein as an inhibitor of nonsense-mediated mRNA decay
Source: PubMed Central journal article supplement (PMC8174725; doi:10.1371/journal.ppat.1009603), 2021-05-21
Supplement: ppat.1009603.s001.pdf [file ppat.1009603.s001.pdf]

1 **Supporting information: Fig S1**

2

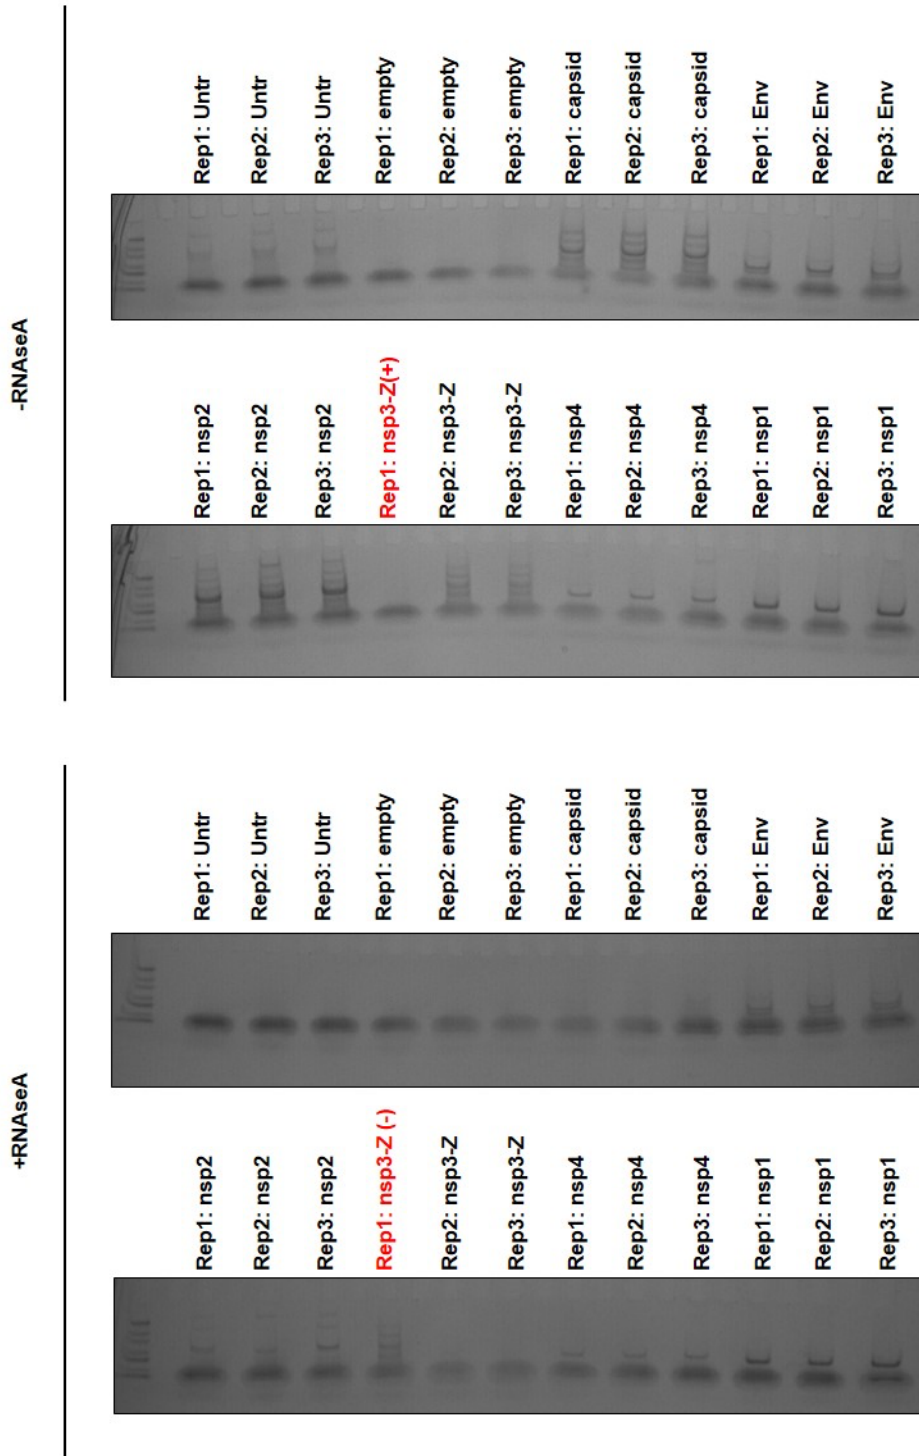

3

4 **Figure S1: Coomassie-stained gels showing eluate samples of SFV affinity purifications that were sent for mass**  
 5 **spectrometry analysis.** Geldoc images of coomassie-stained gels showing eluates (20  $\mu$ L) from three biological replicates of  
 6 each SFV affinity purification electrophoresed 1 cm into the gels, prior to cutting. Rectangular segments (10 mm x 3 mm)  
 7 for each lane were cut from the gel and samples were processed for mass spectrometry analysis. Note that samples of Rep1:  
 8 nsp3-Z were loaded in opposite positions, hence highlighted in red and denoted (+) and (-).  
 9
