# Supplementary material for: Characterisation of the Semliki Forest Virus-host cell interactome reveals the viral capsid protein as an inhibitor of nonsense-mediated mRNA decay
Source: PubMed Central journal article supplement (PMC8174725; doi:10.1371/journal.ppat.1009603), 2021-05-21
Supplement: ppat.1009603.s003.pdf [file ppat.1009603.s003.pdf]

1 **Supporting information: Fig S3**

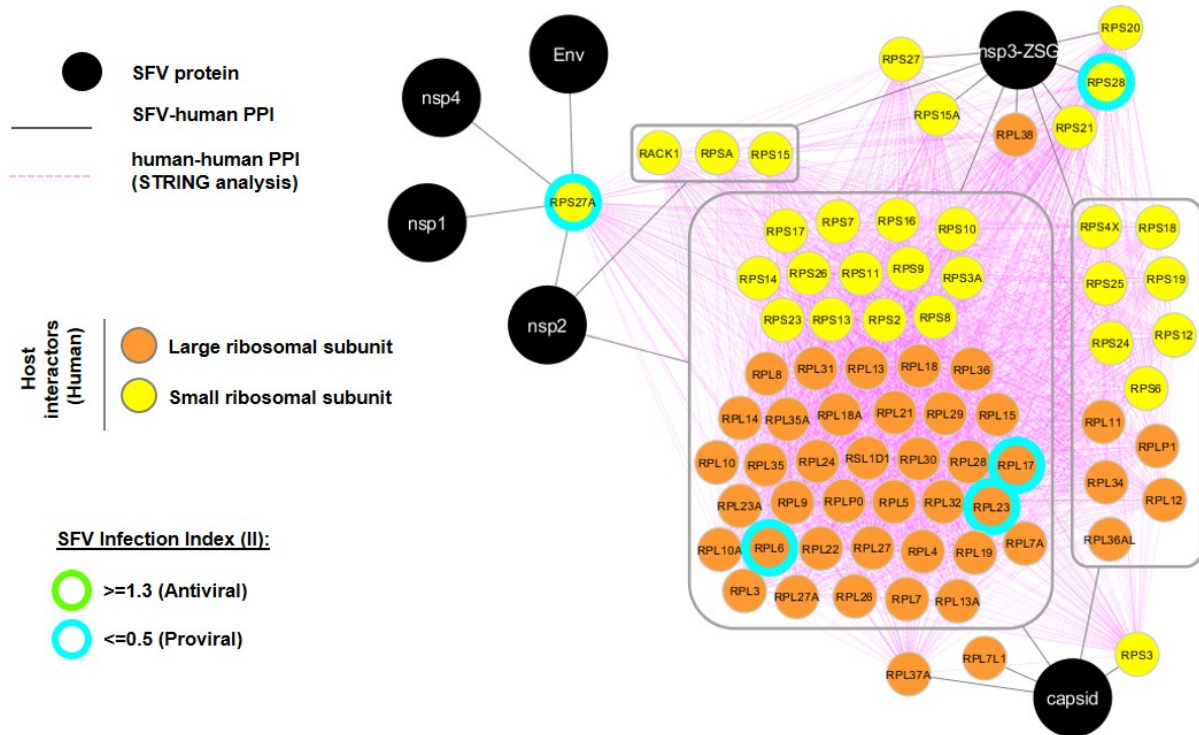

2

3 **Figure S3. A network visualisation of the SFV-ribosomal host protein interactome.** In total, 77 ribosomal host proteins are  
 4 displayed. SFV proteins are depicted in black circles and host proteins are displayed in smaller colour-coded circles according  
 5 to the key. SFV-host PPI are depicted with solid grey lines. Grey boxes reflect host proteins that were identified as interactors  
 6 to more than one of the SFV proteins. In these cases, the solid grey lines connect the grouped set of host proteins to the SFV  
 7 proteins for which they were identified as interactors. Host-host PPI ascertained through STRING analysis are depicted with  
 8 dotted pink lines. The host interactors were collected based on three independent biological replicates. SFV-ribosomal host  
 9 protein interactors identified through a genome-wide fluorescence microscopy based siRNA screen as exhibiting potential  
 10 proviral roles in SFV replication are additionally shown (turquoise borders,  $II \leq 0.5$ ). None were identified as having a potential  
 11 antiviral role (Threshold  $\geq 1.3$ ).  
 12

13

14

15

16

17

18

19

20

21

22

23
