# Supplementary material for: Characterisation of the Semliki Forest Virus-host cell interactome reveals the viral capsid protein as an inhibitor of nonsense-mediated mRNA decay
Source: PubMed Central journal article supplement (PMC8174725; doi:10.1371/journal.ppat.1009603), 2021-05-21
Supplement: ppat.1009603.s004.pdf [file ppat.1009603.s004.pdf]

1 **Supporting information: Fig S4**

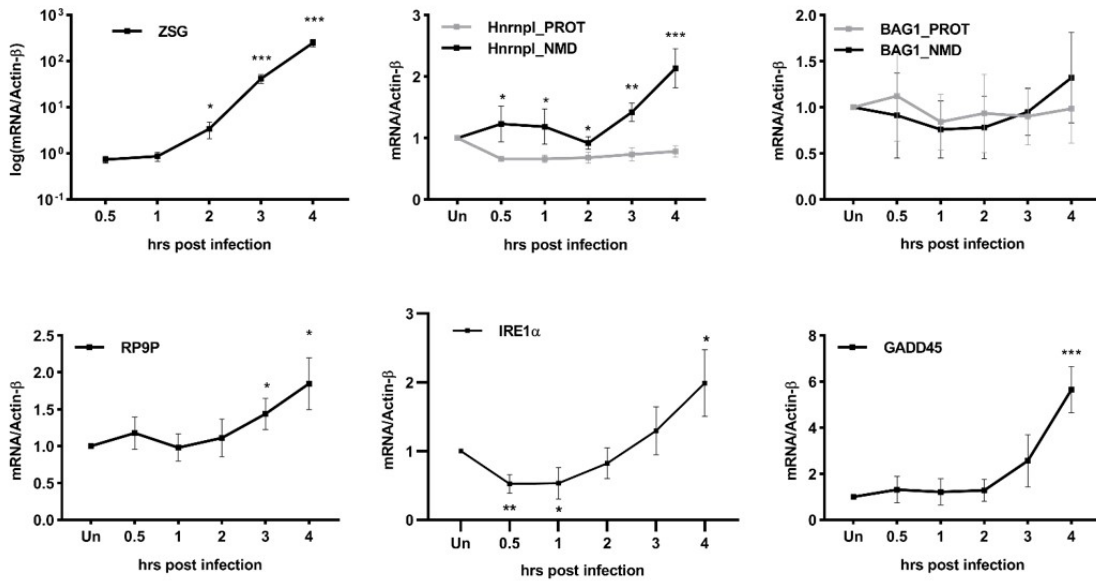

2  
 3 **Figure S4 (Related to Figure 5). SFV infection inhibits NMD at 3-4 hours post infection.** RT-qPCR analysis showing mRNA  
 4 levels relative to Actin-β of the viral RNA (first graph – ‘ZSG’), NMD targets (black lines) and non-NMD targets (light grey lines)  
 5 normalised to either the 0.5 hr sample (in the case of the viral RNA ‘ZSG’) or the Uninfected control, at different time points  
 6 post SFV-ZSG infection. Cells were infected with an MOI of 10. Line graphs display the mean ± SD of four independent  
 7 biological replicates (n=4). Statistical significance was determined using unpaired, two-tailed t-tests, corrected for multiple  
 8 comparisons using the Holm-Šidák method, with alpha = 0.05 (GraphPad Prism, v8.4.1). Asterisks indicate adjusted p values:  
 9 p<0.05\*, p<0.01\*\*, p<0.001\*\*\*.

10  
 11
